# Supplementary material
Source: Royal Society of Chemistry journal article supplement (doi:10.1039/d6cp01431c)
Supplement: d6cp01431c1.pdf [file d6cp01431c1.pdf]

## Supporting Information

### Unlocking the Catalytic Role of Oxygen Functionalities on Carbon-Based Catalysts for Hydrogen Generation from Ammonia Borane

Elisabetta Inico,<sup>b</sup> Silvio Bellomi,<sup>a</sup> Marta Stucchi,<sup>a</sup> Laura Prati,<sup>a</sup> Alberto Villa,<sup>a</sup> Giovanni Di Liberto,<sup>\*b</sup> Ilaria Barlocco<sup>\*a</sup>

<sup>a</sup> Dipartimento di Chimica, Università degli Studi di Milano, Via Golgi 19, 20133 Milano, Italy.

<sup>b</sup> Department of Materials Science, University of Milano-Bicocca, Via Cozzi 55, 20125 Milano, Italy.

Table S1: Graphitisation degree ( $I_D/I_G$ ), oxygen content (O/C) and H<sub>2</sub> productivity of the different carbocatalysts considered.

| Sample name                          | $I_D/I_G$ | O/C  | nH <sub>2</sub> at 180°/<br>mmol*10 <sup>-2</sup> |
|--------------------------------------|-----------|------|---------------------------------------------------|
| CNFs                                 | 0.86      | 0.12 | 5.7                                               |
| O-CNFs-H <sub>2</sub> O <sub>2</sub> | 0.83      | 0.14 | 20.2                                              |
| O-CNFs-HNO <sub>3</sub>              | 0.87      | 0.18 | 45.7                                              |
| Graphite                             | 0.09      | 0.02 | -                                                 |
| O-Graphite                           | 0.08      | 0.07 | 0.9                                               |
| GNP                                  | 0.12      | 0.03 | -                                                 |
| O-GNP                                | 0.13      | 0.03 | -                                                 |



|                                      |                 |                 |                |                |                |                 |                |
|--------------------------------------|-----------------|-----------------|----------------|----------------|----------------|-----------------|----------------|
| CNFs                                 | 284.5<br>(56.7) | 285.5<br>(16.3) | 286.3<br>(6.7) | 287.8<br>(4.1) | 288.8<br>(4.0) | 291.0<br>(6.5)  | 289.6<br>(5.8) |
| O-CNFs-H <sub>2</sub> O <sub>2</sub> | 284.5<br>(66.1) | 285.5<br>(6.6)  | 286.3<br>(8.3) | 287.3<br>(3.1) | 288.2<br>(3.1) | 291.0<br>(7.1)  | 289.6<br>(5.8) |
| O-CNFs-<br>HNO <sub>3</sub>          | 284.5<br>(55.8) | 285.5<br>(21.0) | 286.5<br>(3.6) | 287.3<br>(7.4) | 288.6<br>(4.1) | 291.0<br>(3.8)  | 289.6<br>(3.8) |
| O-Graphite                           | 284.5<br>(69.0) | 285.5<br>(11.9) | 286.1<br>(4.0) | 287.0<br>(4.0) | 288.4<br>(2.3) | 291.0<br>(8.0)  | 289.6<br>(0.7) |
| O-GNP                                | 284.5<br>(57.4) | 285.5<br>(14.3) | 286.5<br>(6.3) | 287.1<br>(4.5) | 288.6<br>(3.4) | 291.0<br>(10.0) | 289.5<br>(1.5) |

Table S3: Summary of the HR analysis of the O1s region of bare and oxidised carbon nanofibers.

| Sample Name                          | C-O-C /<br>BE<br>(At. %) | C-OH /<br>BE<br>(At. %) | C=O /<br>BE<br>(At. %) | COOH /<br>BE<br>(At. %) | H <sub>2</sub> O /<br>BE<br>(At. %) |
|--------------------------------------|--------------------------|-------------------------|------------------------|-------------------------|-------------------------------------|
| CNFs                                 | 532.9<br>(19.5)          | 533.4<br>(14.3)         | 531.4<br>(26.7)        | 532.3<br>(32.3)         | 535.0<br>(7.3)                      |
| O-CNFs-H <sub>2</sub> O <sub>2</sub> | 533.2<br>(23.1)          | 533.1<br>(18.2)         | 531.1<br>(24.5)        | 532.1<br>(29.3)         | 535.1<br>(7.9)                      |
| O-CNFs-<br>HNO <sub>3</sub>          | 533.1<br>(7.4)           | 534.0<br>(4.4)          | 531.3<br>(37.7)        | 532.8<br>(44.4)         | 535.0<br>(6.2)                      |
| O-Graphite                           | 533.4<br>(21.6)          | 534.1<br>(9.1)          | 531.4<br>(25.2)        | 532.4<br>(40.3)         | 535.5<br>(3.9)                      |
| O-GNP                                | 533.4<br>(23.3)          | 534.0<br>(11.5)         | 531.5<br>(28.1)        | 532.4<br>(32.3)         | 535.5<br>(4.7)                      |

As reported in the Results section, three possible activation pathways are reported:

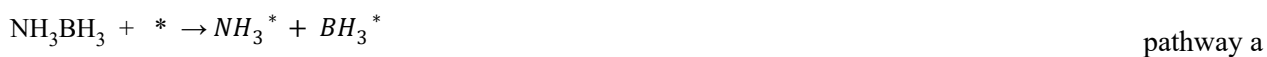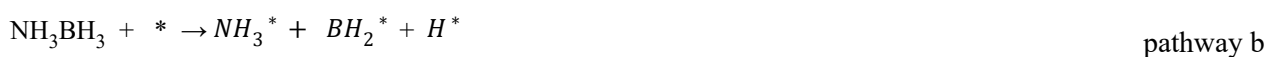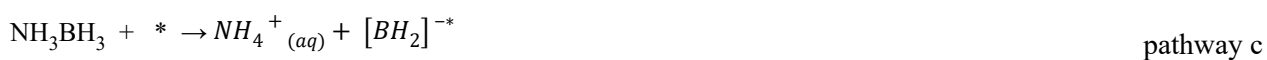

Table S4: Entropic and zero-point energy contributions for each functional group.

| Functional group | Specie              | $TS / eV$ | $E_{ZPE} / eV$ | $\Delta E / eV$ | $\Delta G / eV$ |
|------------------|---------------------|-----------|----------------|-----------------|-----------------|
| C-OH             | $NH_3^* BH_3^*$     | 1.14      | 2.58           | 0.79            | 0.99            |
|                  | $NH_4^+ BH_2^*$     | 0.43      | 1.05           | -0.11           | -0.20           |
| C-O-C            | $NH_4^+ BH_2^*$     | 0.17      | 0.67           | -0.01           | -0.22           |
| C=O              | $NH_3^* BH_3^*$     | 1.04      | 2.06           | 0.02            | -0.21           |
|                  | $NH_3^* BH_2^* H^*$ | 1.14      | 2.52           | 0.77            | 0.90            |
|                  | $NH_4^+ BH_2^*$     | 0.32      | 0.74           | -1.54           | -1.84           |
| COOH             | $NH_3^* BH_3^*$     | 1.01      | 2.30           | 0.49            | 0.54            |
|                  | $NH_3^* BH_2^* H^*$ | 1.51      | 2.87           | 0.66            | 0.78            |
|                  | $NH_4^+ BH_2^*$     | 0.18      | 0.55           | -0.93           | -1.27           |
|                  | $NH_4^+$            | 0.36      | 0.88           | -               | -               |
|                  | $NH_3BH_3$          | 0.61      | 1.85           | -               | -               |
|                  | $NH_4BO_2$          | 0.76      | 1.53           | -               | -               |

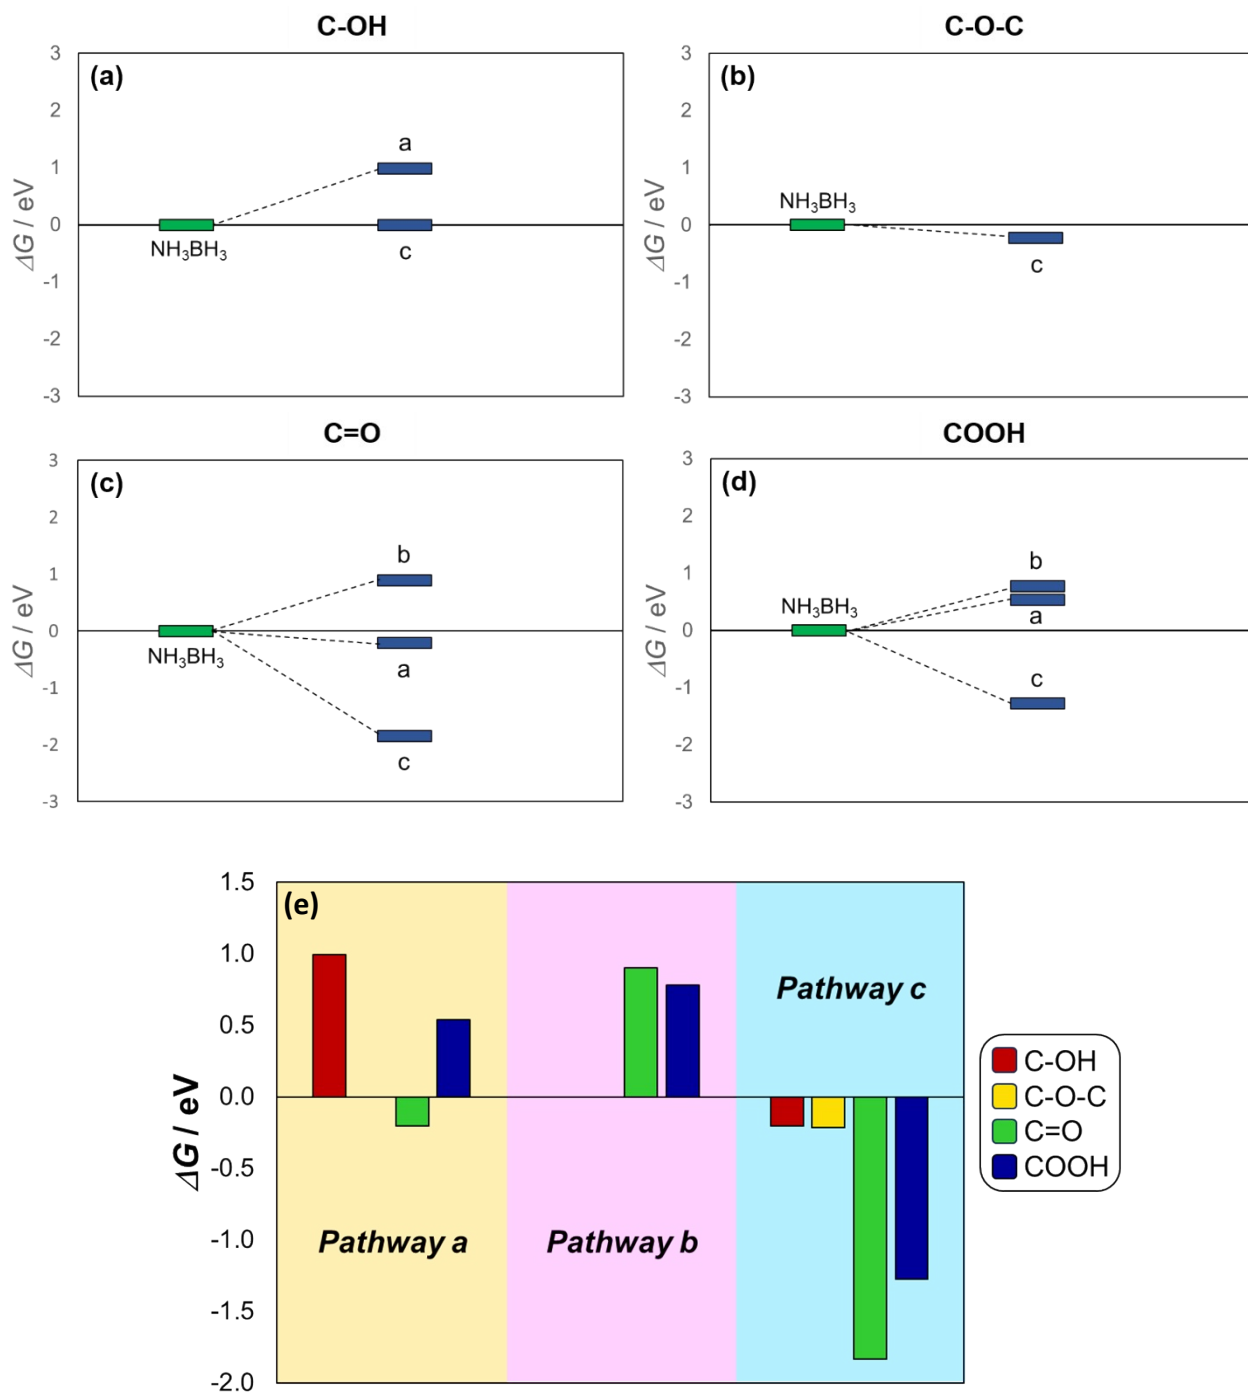

Figure S3: free energy diagrams for C-OH (a), C-O-C (b), C=O (c) and COOH (d) systems. (e) Comparison of the free energy of the different functional groups for the pathways considered in the study. In particular, the adsorption step of  $\text{NH}_3\text{BH}_3$  is reported; the considered pathways are explained above and in the main text in the results section.

Table S5: Gibbs free energy values for each functional group with and without considering the role of the solvent.

| Functional group | Pathway | $\Delta G / \text{eV}$ | $\Delta G_{\text{SOLV}} / \text{eV}$ |
|------------------|---------|------------------------|--------------------------------------|
| C-OH             | a       | 0.99                   | 1.28                                 |
|                  | c       | -0.20                  | -0.40                                |
| C-O-C            | b       | -0.22                  | -0.41                                |
| C=O              | a       | -0.21                  | 0.13                                 |
|                  | b       | 0.90                   | 1.23                                 |
|                  | c       | -1.84                  | -1.86                                |
| COOH             | a       | 0.54                   | 0.96                                 |
|                  | b       | 0.78                   | 1.06                                 |
|                  | c       | -1.27                  | -1.01                                |

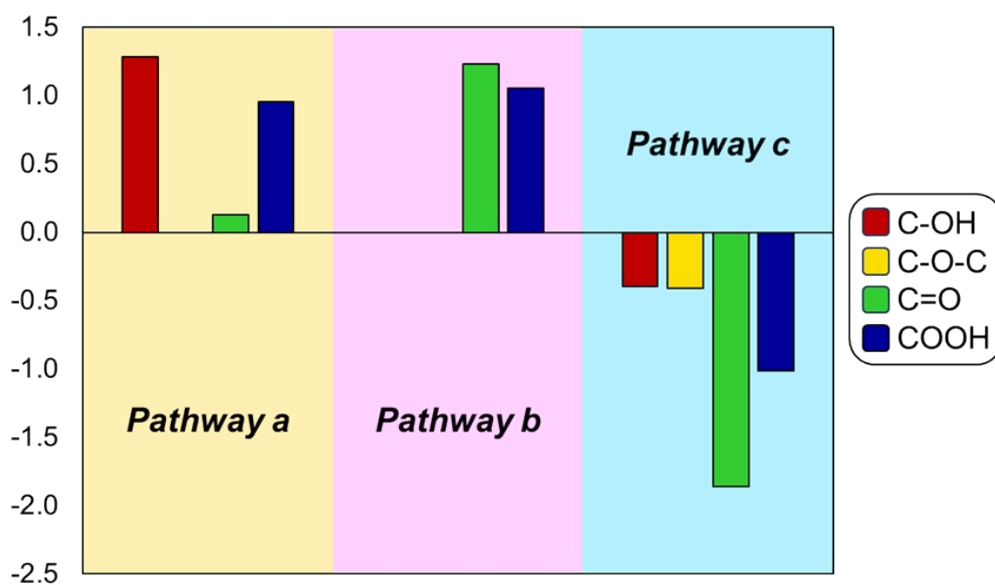

Figure S4: free energy diagrams for C-OH (a), C-O-C (b), C=O (c) and COOH (d) systems considering implicit solvation model. In particular, the adsorption step of  $\text{NH}_3\text{BH}_3$  is reported; the considered pathways are explained above and in the main text in the results section.

Table S6: evolution of C-O bond distances in the considered functional groups according to the chosen pathway

| Functional group | Pathway | $d(\text{C-O}) / \text{\AA}$ |
|------------------|---------|------------------------------|
| C-OH             | -       | 1.35                         |
|                  | a       | 1.41                         |
|                  | c       | 1.34                         |
| C-O-C            | -       | 1.49                         |
|                  | c       | 1.40 - 2.35                  |
| C=O              | -       | 1.23                         |
|                  | a       | 1.40                         |
|                  | b       | 1.30                         |
|                  | c       | 1.36                         |
| COOH             | -       | 1.22                         |
|                  | a       | 1.33                         |
|                  | b       | 1.30                         |
|                  | c       | 1.31                         |
